# Supplementary material for: Comparative survey among paediatricians, nurses and health information technicians on ethics implementation knowledge of and attitude towards social experiments based on medical artificial intelligence at children’s hospitals in Shanghai: a cross-sectional study
Source: HighWire-hosted journal article supplement (doi:10.1136/bmjopen-2022-071288), 2023-11-01
Supplement: bmjopen-2022-071288supp002_data_supplement.pdf [file bmjopen-2022-071288supp002_data_supplement.pdf]

## Appendix B: Systematic Literature Retrieval

### 1 Data Source

Databases: BYU Law, Westlaw, Web of Science, JSTOR, Springer

International Organization Website: UNESCO Library, OECD Library, EP Library, et al.

national government departments and relevant committees :Using the United States as an example: THE WHITE HOUSE(<http://www.whitehouse.gov>), Science technology council(<https://www.nstc.org.zm>), homeland security(<http://www.dhs.gov>), Information Network Sector(<http://www.nitrd.gov>), department of Defense (<https://innovation.defense.gov/>).

### 2 Retrieval Strategy

The title should contain: (artificial intelligence or AI or robot) and (ethic or moral or governance or risk or principle or guideline or consensus)

Time Range: January 1, 2016 to May 1, 2021

### 3 Primary Reference Lists

| NO. | Publishing Agency   | Document Title                                                                                                           | Year |
|-----|---------------------|--------------------------------------------------------------------------------------------------------------------------|------|
| 1   | European Parliament | An EU framework for artificial intelligence                                                                              | 2020 |
| 2   | European Parliament | Artificial intelligence: From ethics to policy                                                                           | 2020 |
| 3   | European Parliament | European framework on ethical aspects of artificial intelligence, robotics and related technologies                      | 2020 |
| 4   | European Parliament | EU guidelines on ethics in artificial intelligence: Context and implementation                                           | 2019 |
| 5   | European Parliament | European Civil Law Rules in Robotics                                                                                     | 2016 |
| 6   | European Commission | Ethics Guidelines for Trustworthy AI                                                                                     | 2018 |
| 7   | OECD                | OECD Principles on AI                                                                                                    | 2019 |
| 8   | China               | Practice Guide of Network Security - Prevention of Ethical Security Risks of Artificial Intelligence                     | 2021 |
| 9   | China               | The Governance Principle of the New Generation of Artificial Intelligence-Developing Responsible Artificial Intelligence | 2019 |
| 10  | UNESCO              | Recommendation on the Ethics of Artificial Intelligence                                                                  | 2021 |
| 11  | UNESCO              | Preliminary Study on the Ethics of Artificial Intelligence                                                               | 2019 |

---

|    |                    |                                                                                                                  |      |
|----|--------------------|------------------------------------------------------------------------------------------------------------------|------|
| 12 | UNESCO             | Ethical principles for the development of Artificial Intelligence based on the diversity of cultural expressions | 2018 |
| 13 | America            | Executive Order Promoting the Use of Trustworthy AI in the Federal Government                                    | 2020 |
| 14 | America            | Technology Assessment: Artificial Intelligence in Health Care                                                    | 2020 |
| 15 | America            | Artificial Intelligence Ethics Framework for the Intelligence Community                                          | 2020 |
| 16 | America            | Four Principles of Explainable Artificial Intelligence                                                           | 2020 |
| 17 | America            | Ethical Principles for Artificial Intelligence                                                                   | 2020 |
| 18 | America            | Principles of Artificial Intelligence Ethics for the Intelligence Community                                      | 2020 |
| 19 | America            | Guidance for Regulation of Artificial Intelligence Applications                                                  | 2020 |
| 20 | Britain            | Robots and robotic devices Guide to the ethical design and application of robots and robotic systems             | 2016 |
| 21 | The European Union | Ethics Guidelines for Trustworthy AI                                                                             | 2020 |
| 22 | Korea              | National Ethical Standards for Artificial Intelligence                                                           | 2020 |
| 23 | WHO                | Ethics and governance of artificial intelligence for health: WHO guidance                                        | 2021 |
| 24 | Australia          | Australia's Artificial Intelligence Ethics Framework                                                             | 2019 |
| 25 | IEEE               | Ethical Guidelines for the Design of Artificial Intelligence                                                     | 2019 |
| 26 | IEEE               | Ethically Aligned Design Version 2                                                                               | 2017 |
| 27 | Singapore          | Model AI Governance Framework                                                                                    | 2019 |

---
