# Supplementary material for: Comparative survey among paediatricians, nurses and health information technicians on ethics implementation knowledge of and attitude towards social experiments based on medical artificial intelligence at children’s hospitals in Shanghai: a cross-sectional study
Source: HighWire-hosted journal article supplement (doi:10.1136/bmjopen-2022-071288), 2023-11-01
Supplement: bmjopen-2022-071288supp003_data_supplement.pdf [file bmjopen-2022-071288supp003_data_supplement.pdf]

**Appendix C:****A questionnaire for pediatric medical staff's ethics implementation knowledge and attitude of medical artificial intelligence social experiments****I Knowledge dimension**

**Introduction:** We would like to invite you to present how you are familiar with the statement on ethics implementation knowledge of social experiments based on medical artificial intelligence (MAI) . Please mark only one option for each item.

K1 The status quo of performing MAI social experiments in pediatrics.

☐Unfamiliar

☐Uncertain

☐Familiar

K2 Common ethical issues in MAI social experiments in pediatrics.

☐Unfamiliar

☐Uncertain

☐Familiar

K3 Underlying reasons for ethical issues in MAI social experiments in pediatrics.

☐Unfamiliar

☐Uncertain

☐Familiar

K4 Coping strategies for ethical issues in MAI social experiments in pediatrics.

☐Unfamiliar

☐Uncertain

☐Familiar

K5 Principles, norms and guidelines for implementing ethics in MAI social experiments in pediatrics.

☐Unfamiliar

☐Uncertain

☐Familiar

K6 Policies or regulations for implementing ethics in MAI social experiments in pediatrics.

☐Unfamiliar

☐Uncertain

☐Familiar

K7 Content of ethical review for MAI social experiments in pediatrics.

☐ Unfamiliar

☐ Uncertain

☐ Familiar

K8 Ethical supervision mechanism for MAI social experiments in pediatrics.

☐ Unfamiliar

☐ Uncertain

☐ Familiar

K9 Ethical risk management approaches for MAI social experiments in pediatrics.

☐ Unfamiliar

☐ Uncertain

☐ Familiar

K10 Consequences of ethical violations for MAI social experiments in pediatrics.

☐ Unfamiliar

☐ Uncertain

☐ Familiar

## II Attitude Dimension

**Instruction:** We would like to invite you to present how you agree with the statement on ethics implementation of social experiments based on medical artificial intelligence (MAI).

Please mark only one option.

A1 AI experts should be involved in the research ethics committee for MAI social experiments review in pediatrics.

☐ Disagree

☐ Neutral

☐ Agree

A2 Principles, norms, and guidelines on implementing ethics in MAI social experiments in pediatrics should be easy to understand and be transformed into a workable process.

☐ Disagree

☐ Neutral

☐ Agree

A3 Ethical researchers should be involved in MAI social experiments in pediatrics.

☐ Disagree

☐ Neutral

☐ Agree

A4 A unified ethical review can be a barrier to performing MAI social experiments in pediatrics.

☐ Disagree

☐ Neutral

☐ Agree

A5 Clarified subjects of ethical responsibility in MAI social experiments in pediatrics can facilitate ethical supervision.

☐ Disagree

☐ Neutral

☐ Agree

A6 Participating in ethical education and training programs focusing on MAI social experiments is helpful for ethical supervision.

☐ Disagree

☐ Neutral

☐ Agree

A7 It is necessary to take children's and guardians' opinions into account while performing MAI social experiments in pediatrics. When children's views are contrary to the guardians', we should adopt the guardians' ones.

☐ Disagree

☐ Neutral

☐ Agree

A8 Establishing an effective supervision mechanism is helpful.

☐ Disagree

☐ Neutral

☐ Agree

A9 Content of ethical supervision can be dynamically adjusted according to the clinical context.

☐ Disagree

☐ Neutral

☐ Agree

A10 The number of children or guardians against MAI will increase after having a comprehensive understanding of the ethical risk in MAI social experiments in pediatrics.

☐ Disagree

☐Neutral

☐Agree

A11 Strict ethical risk management can hinder performing MAI social experiments in pediatrics.

☐Disagree

☐Neutral

☐Agree
